# Supplementary material for: Ambient direct arylation synthesis of thienothiophene based copolymers with mixed alkoxy and oligoether side chains
Source: Royal Society of Chemistry journal article supplement (doi:10.1039/d6sc01881e), 2026-05-26
Supplement: d6sc01881e1.pdf [file d6sc01881e1.pdf]

## Supplementary Information

### **Ambient Direct Arylation Synthesis of Thienothiophene Based Copolymers with Mixed Alkoxy and Oligoether Side Chains**

Di Zhu<sup>a</sup>, Judith Pons i Tarrés<sup>a</sup>, Joost Kimpel<sup>a</sup>, Meghna Jha<sup>a</sup>, Mariavittoria Craighero<sup>a</sup>, Jesika Asatryan<sup>b</sup>, Alberto Peinador Veiga<sup>b</sup>, Zesheng Liu<sup>c</sup>, Tania Cecilia Hidalgo<sup>a</sup>, Megan Westwood<sup>a</sup>, Mats Fahlman<sup>c</sup>, Jaime Martín<sup>b</sup>, Alexander Giovannitti<sup>a</sup>, Christian Müller<sup>a\*</sup>

<sup>a</sup>Department of Chemistry and Chemical Engineering, Chalmers University of Technology,  
41296 Gothenburg, Sweden

e-mail: [christian.muller@chalmers.se](mailto:christian.muller@chalmers.se)

<sup>b</sup>Universidade da Coruña, Campus Industrial de Ferrol, CITENI, Esteiro, Ferrol, Spain

<sup>c</sup>Laboratory of Organic Electronics, Department of Science and Technology, Linköping  
University, Norrköping, Sweden

# Contents

|                                                                         |    |
|-------------------------------------------------------------------------|----|
| S1. Experimental details.....                                           | 3  |
| S1.1. Chemicals.....                                                    | 3  |
| S1.2. Analytical techniques and device fabrication .....                | 4  |
| S1.3. Monomer synthesis .....                                           | 6  |
| S1.4. Polymer synthesis .....                                           | 11 |
| S1.5. Molecular weight derivation by NMR.....                           | 16 |
| S1.6. Molecular weight estimation by SEC .....                          | 17 |
| S2. Synthetic complexity index of polymerization ( $SCI_{poly}$ ) ..... | 18 |
| S3. Polymer characterization .....                                      | 20 |
| S3.1. Ultraviolet photoelectron spectroscopy (UPS) .....                | 21 |
| S3.2. Electrochemical characterization .....                            | 22 |
| S3.3. Grazing incidence wide-angle X-ray scattering (GIWAXS) .....      | 28 |
| S3.4. Electrical and mechanical properties .....                        | 29 |
| S4. References.....                                                     | 30 |

## S1. Experimental details

### S1.1. Chemicals

Analytical grade *n*-hexanes (Fisher Scientific,  $\geq 99.5\%$ ), ethyl acetate (Fisher Scientific,  $\geq 99.5\%$ ), methanol (MeOH, Fisher Scientific,  $\geq 99.9\%$ ), isopropanol (Fisher Scientific,  $\geq 99.9\%$ ), chloroform (Fisher Scientific,  $\geq 99.8\%$ ), acetonitrile (Fisher Scientific,  $\geq 99.8\%$ ), chlorobenzene (Sigma,  $\geq 99.5\%$ ), *N*-butyl-2-pyrrolidone (NBP, Sigma Aldrich,  $\geq 99.5\%$ ), 3,6-dibromothiopheno[3,2-*b*]thiophene (Combi-block, 98%), 5,5'-dibromo-2,2'-bithiophene (Br-T2-Br, TCI,  $> 98.0\%$ ), triethylene glycol monomethyl ether (Sigma Aldrich, 95%), decan-1-ol (Sigma Aldrich, 98%), sodium hydride (Sigma Aldrich, 60%, dispersion in mineral oil) and copper(I) iodide (Sigma Aldrich,  $\geq 99.5\%$ ) palladium acetate ( $[\text{Pd}(\text{OAc})_2]_3$ , Sigma Aldrich, 98%) and potassium carbonate (Sigma Aldrich,  $\geq 99.0\%$ ) and F<sub>4</sub>TCNQ (TCI,  $> 98\%$ ) were used as received. Anhydrous 2-methyltetrahydrofuran (2-MeTHF, Thermo Scientific,  $\geq 99.0\%$ ) and anhydrous dimethylacetamide (DMAc, Thermo Scientific, 99.8%) were taken from their vessels under a constant stream of nitrogen.

## **S1.2. Analytical techniques and device fabrication**

**Room temperature nuclear magnetic resonance (NMR).** Room temperature spectra were recorded on an Oxford 800 magnet, Bruker Avance III HD spectrometer ( $^1\text{H}$ : 800 MHz,  $^{13}\text{C}$ : 201 MHz). The  $^1\text{H}$  and  $^{13}\text{C}$  NMR spectra were referenced to the residual solvent peak ( $\text{CDCl}_3$ :  $\delta(^1\text{H}) = 7.26$  ppm,  $\delta(^{13}\text{C}) = 77.16$  ppm).

**Single crystal X-ray crystallography.** The monomer crystal structures were obtained by mounting suitable crystals on a nylon loop on an XtaLAB Rigaku Synergy R, HyPix diffractometer using  $\text{CuK}\alpha$  radiation ( $\lambda = 1.54184$  Å). The crystals were kept at a steady temperature  $T = 116.0(2)$  K during data collection. Their structures were solved with the ShelXT21 structure solution program using the Intrinsic Phasing solution method and by using Olex2 as the graphical interface.<sup>1,2</sup>

**Organic electrochemical transistor (OECT) fabrication and small signal analysis.** The gate and drain channels were grounded via the 'CE to ground' mode in the EC-Lab software, which allows voltage to be measured based on the source electrode. The gate was operated with a three-electrode setup, while the drain used a two-electrode setup. The Ag/AgCl and Pt electrodes were connected to the S1 and P1 ports for applying gate potential, with the source electrode connected to the S2, S3, and GND ports (henceforth, S1: high potential, P1: high current, S2 and S3: low potential, GND: ground). For the drain potential, the drain electrode was connected to the P1 and S1 ports, and the source electrode to the S2, S3, and GND ports. The gate potential was controlled using the 'AC-Voltammetry' function (a triangular potential with a small sinusoidal waveform), and the drain potential using the 'Constant-Voltage' function (constant voltage bias). The 'synchronize' function in the software was used to coordinate measurements on both channels. Electrical and electrochemical parameters were calculated with MATLAB software.<sup>3</sup>

The resistance of the metal line patterns  $R_{line}$  were comparable with the channel resistance  $R_{ch}$ , and hence the parasitic resistance values were corrected with the measured  $R_{line}$  value.<sup>3</sup> In case of OECT devices that have a very high on-current value, the channel resistance does not equal the input resistance  $R_{in}$  (i.e., the total resistance of a device including the channel resistance  $R_{ch}$  as well as the line resistances of the source and drain electrodes,  $R_{line,S}$  and  $R_{line,D}$ ). Thus, the voltage across the channel  $V_{ch}$  is smaller than the applied voltage  $V_{DS}$ . Hence, all parameters were recalculated with the corrected drain current by using the correct voltage experienced by the channel, assuming no parasitic resistance between the two drain and source contact pads according to ref. <sup>3</sup>.

### S1.3. Monomer synthesis

#### 3,6-bis(decyloxy)thieno[3,2-*b*]thiophene ( $a_{10}$ TT)

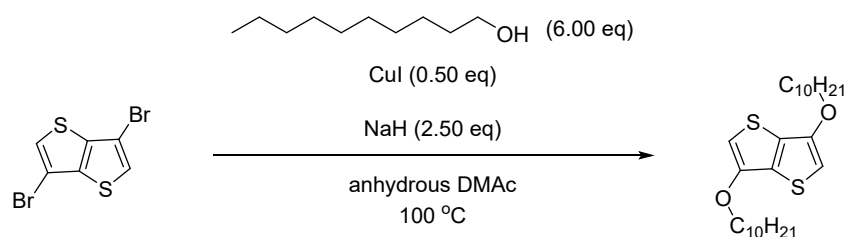

**Fig. S1.** Reaction scheme of 3,6-bis(decyloxy)thieno[3,2-*b*]thiophene ( $a_{10}$ TT).

Decan-1-ol was dried over molecular sieves and purged with argon before the reaction. Anhydrous DMAc (6.70 mL) was charged into a dried two-neck round bottom flask equipped with a condenser on one neck and a rubber septum on the other, under nitrogen atmosphere. The system was cooled down to  $\sim 0$  °C with an ice bath. While stirring, 60% mineral suspension of sodium hydride (1.01 g, 25.17 mmol, 2.50 eq) was added, and the dispersion is brought back to the nitrogen atmosphere. Dried decan-1-ol (11.52 mL, 60.40 mmol, 6.00 eq) was added dropwise to the system. Once the decan-1-ol was depleted, the mixture was slowly heated to 35 °C and left to stir until no more bubble formation was observed. To avoid the formation of sodium decan-1-oxide, which can lead to solidification of the system, the temperature was slightly increased ( $< 50$  °C) and/or 2 – 3 mL anhydrous DMAc was added to dilute the system, where necessary. Solids of 3,6-dibromothieno[3,2-*b*]thiophene (3.00 g, 10.07 mmol, 1.00 equiv.) and copper iodide (958.61 mg, 5.03 mmol, 0.50 equiv.) were mixed and added to the solution simultaneously. Then, the reaction mixture was slowly heated up to 100 °C (5-10 °C every 10 min). The reaction was monitored using thin layer chromatography with hexane as the eluent ( $R_f = 0.21$ ). After 24 hours, the reaction was cooled to room temperature and filtered to remove residual solids. The residual solids were washed with  $2 \times 50$  mL of ethyl acetate. The combined filtrates were washed with  $3 \times 100$  mL saturated  $\text{NH}_4\text{Cl}$  solution. The combined aqueous phase was extracted with  $3 \times 150$  mL ethyl acetate. The combined organic phase was

dried over anhydrous  $\text{MgSO}_4$ . The mixture was concentrated *in vacuo* to yield a dark brown crude oil, which slowly crystallized. The crude was dissolved in a minimal amount of ethyl acetate and passed through a silica gel column (eluent: hexane  $\rightarrow$  5 vol% ethyl acetate in hexane). The obtained product was recrystallized in hexane at  $-20\text{ }^\circ\text{C}$  to yield off-white crystals (2.06 g, 4.55 mmol, 45%).  $^1\text{H}$  NMR (800 MHz,  $\text{CDCl}_3$ )  $\delta$  6.23 (s, 2H), 4.05 (t,  $J = 6.6\text{ Hz}$ , 4H), 1.85 – 1.77 (m, 4H), 1.50 – 1.42 (m, 8H), 1.39 – 1.24 (m, 8H), 0.88 (t,  $J = 7.0\text{ Hz}$ , 6H).  $^{13}\text{C}$  NMR (201 MHz,  $\text{CDCl}_3$ )  $\delta$  150.2, 128.6, 97.8, 70.6, 32.0, 29.6, 29.4, 29.4, 29.2, 26.0, 22.7, 14.2.

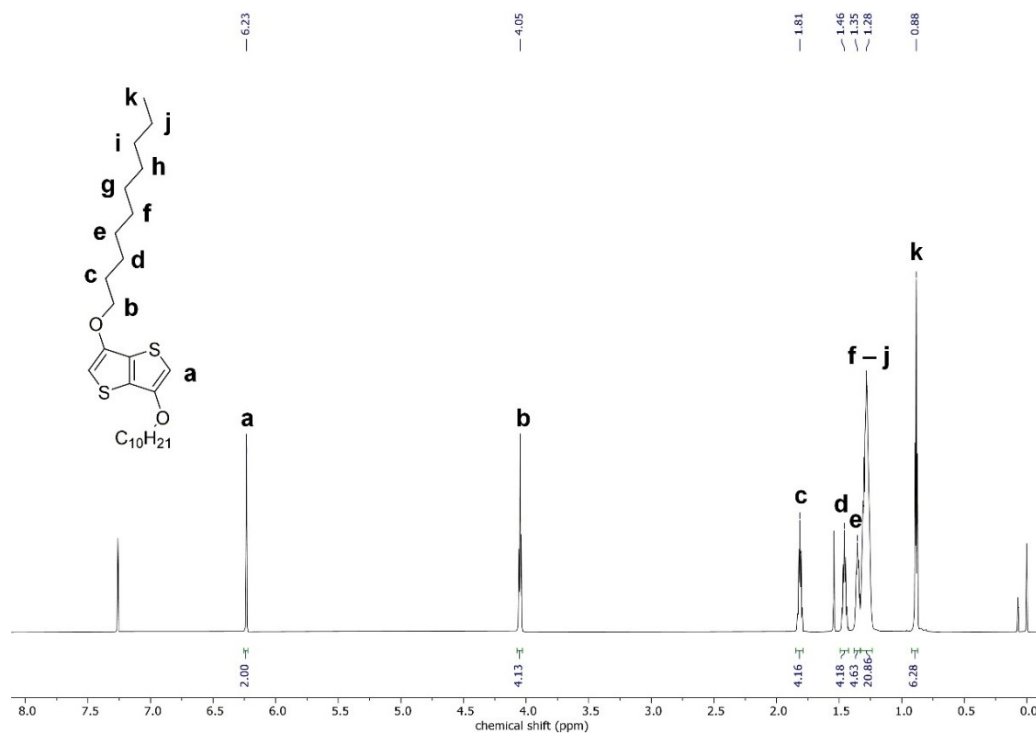

**Fig. S2.**  $^1\text{H}$  NMR spectrum ( $\text{CDCl}_3$ , 800 MHz, 298K) of 3,6-bis(decyloxy)thieno[3,2-*b*]thiophene.

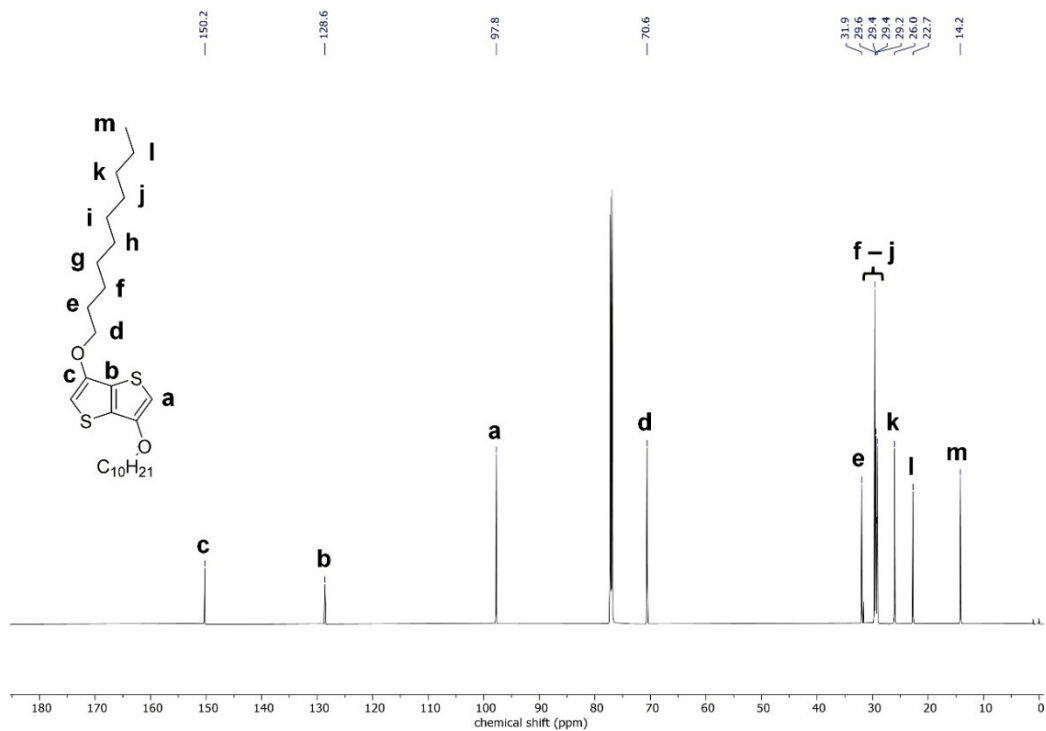

**Fig. S3.**  $^{13}\text{C}$  NMR spectrum ( $\text{CDCl}_3$ , 201 MHz, 298K) of 3,6-bis(decyloxy)thieno[3,2-*b*]thiophene.

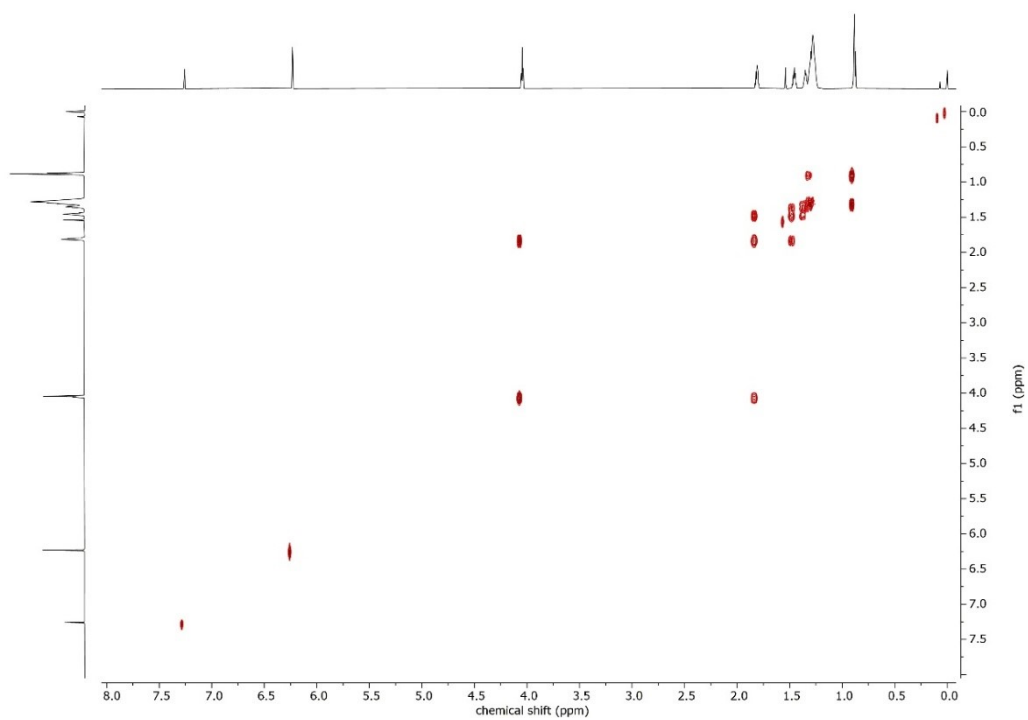

**Fig. S4.**  $^1\text{H}$  COSY NMR spectrum ( $\text{CDCl}_3$ , 800 MHz, 298K) of 3,6-bis(decyloxy)thieno[3,2-*b*]thiophene.

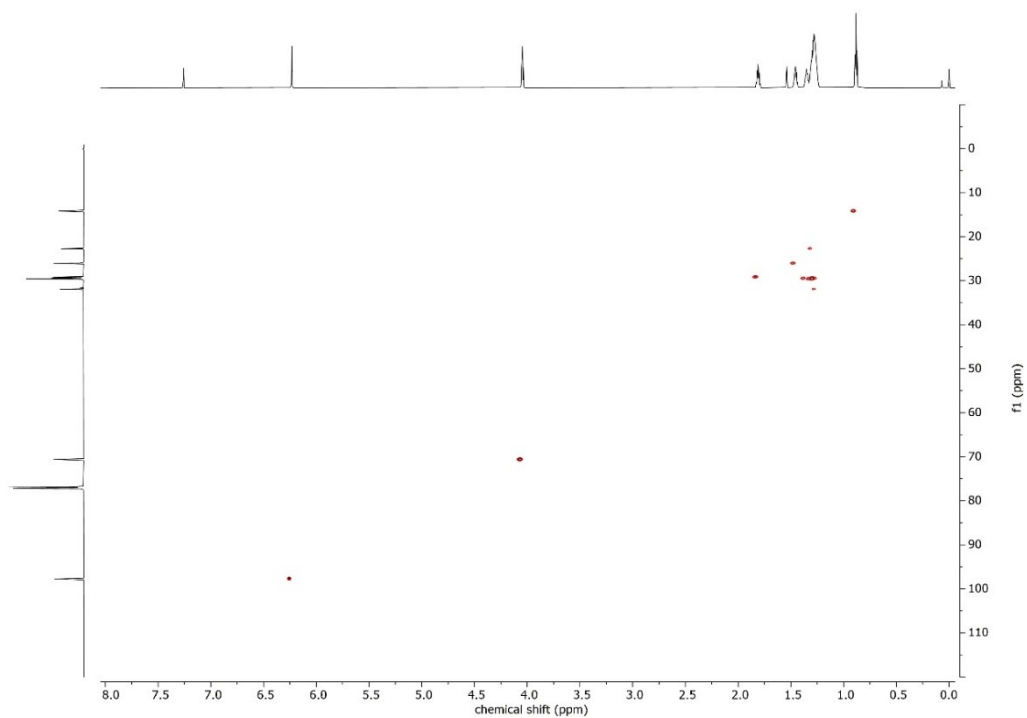

**Fig. S5.** HSQC NMR spectrum ( $\text{CDCl}_3$ , 800/201 MHz, 298K) of 3,6-bis(decyloxy)thieno[3,2-*b*]thiophene.

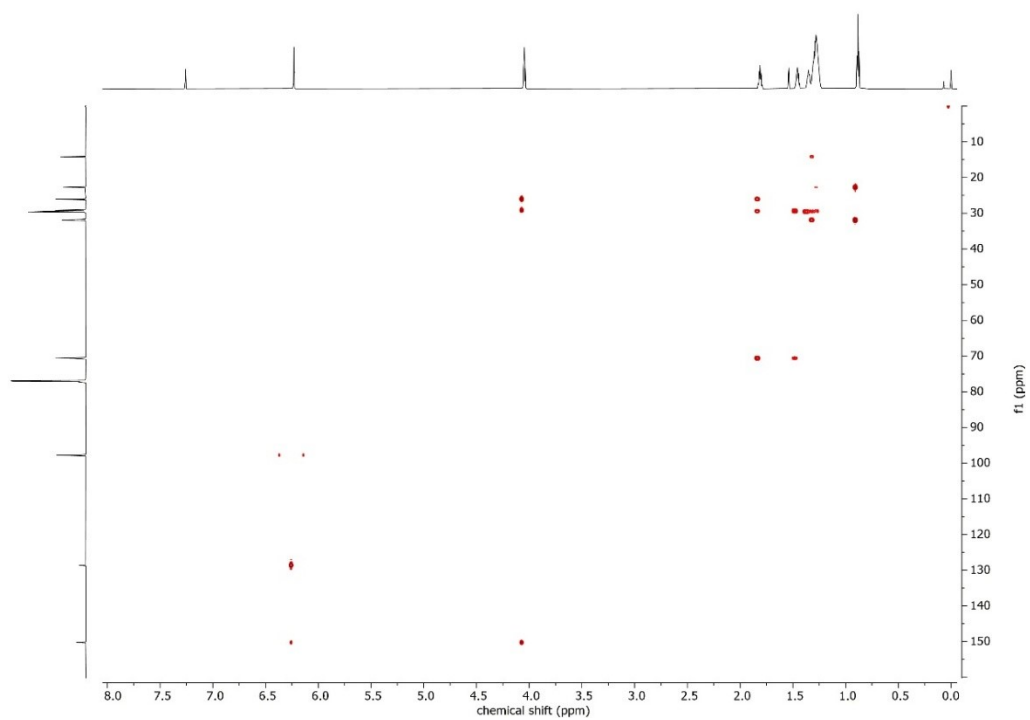

**Fig. S6.** HMBC NMR spectrum ( $\text{CDCl}_3$ , 800/201 MHz, 298K) of 3,6-bis(decyloxy)thieno[3,2-*b*]thiophene.

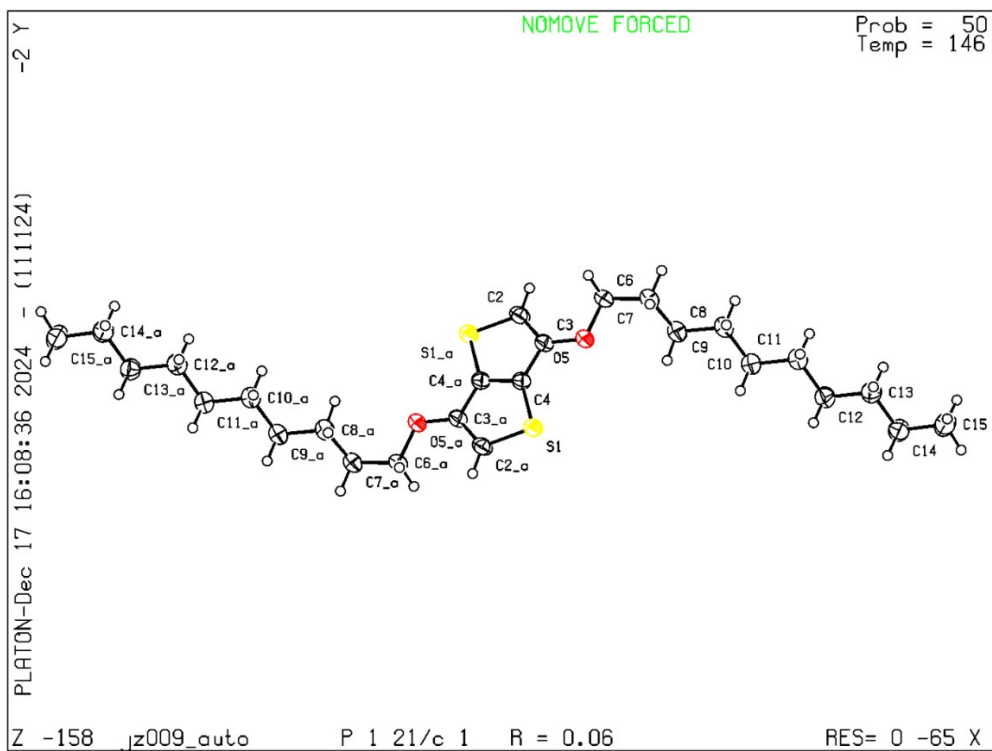

**Fig. S7.** Single crystal X-ray ellipsoid plot of 3,6-bis(decyloxy)thieno[3,2-*b*]thiophene (CCDC = 2503701). Further crystallographic data can be obtained from CCDC or ref. <sup>4</sup>.

## S1.4. Polymer synthesis

### General procedure of polymer synthesis

$a_{10}$ TT ( $R$  eq., **Table S1**),  $g_3$ TT ( $1 - R$  eq., **Table S1**), Br-T2-Br (1 eq) and  $K_2CO_3$  (3 eq) were charged into a 10 mL high pressure reaction vial. The solid mixture underwent three  $N_2$ /vacuum cycles and was then kept under vacuum for 30 minutes. A stock solution of 2.5 mM  $Pd[(OAc)_2]_3$  in argon-purged NBP was freshly made under argon atmosphere by vigorously stirring at 45 °C for 30 minutes. After the reaction vial was filled with argon, the required amount of stock solution (0.05 eq of  $Pd[(OAc)_2]_3$ ) was added to the solids. The reaction mixture was heated to 45 °C and vigorously stirred for 14 hours. Reaction progress was monitored by precipitation of aliquots in isopropanol, ethyl acetate and chloroform. Once precipitates formed in isopropanol and ethyl acetate, the reaction was considered complete. The mixture was precipitated into methanol. Solids were collected by filtration using filter paper. Soxhlet extraction was performed with isopropanol, ethyl acetate to remove the impurities and lower molecular weight fractions and chloroform to extract the solution processable polymer product. Chloroform was removed from the product *in vacuo*. The collected product was dried in a vacuum oven overnight at 50 °C.

**Table S1. Stoichiometry table of synthesis of p[(g<sub>3</sub>TT-T2)-ran-(a<sub>10</sub>TT-T2)] and p(a<sub>10</sub>TT-T2).**

| Polymers | a <sub>10</sub> TT |              |                 | g <sub>3</sub> TT |              |                 | Br-T2-Br     |                 |                       | K <sub>2</sub> CO <sub>3</sub> |                 | Pd(OAc) <sub>2</sub><br>stock<br>solution | Product      |              |
|----------|--------------------|--------------|-----------------|-------------------|--------------|-----------------|--------------|-----------------|-----------------------|--------------------------------|-----------------|-------------------------------------------|--------------|--------------|
|          | R<br>(eq.)         | Mass<br>(mg) | Moles<br>(μmol) | 1 - R<br>(eq.)    | Mass<br>(mg) | Moles<br>(μmol) | Mass<br>(mg) | Moles<br>(μmol) | Concentration<br>(mM) | Mass<br>(mg)                   | Moles<br>(μmol) | Volume<br>(mL)                            | Mass<br>(mg) | Yield<br>(%) |
| P12      | 0.1                | 7.0          | 15.4            | 0.9               | 64.5         | 138.9           | 50           | 154.3           | 50                    | 64.0                           | 462.9           | 3.1                                       | 69           | 72           |
| P35      | 0.3                | 21.0         | 46.3            | 0.7               | 50.2         | 108.0           | 50           | 154.3           | 50                    | 64.0                           | 462.9           | 3.1                                       | 40           | 42           |
| P59      | 0.5                | 27.9         | 61.7            | 0.5               | 28.7         | 61.7            | 40           | 123.4           | 50                    | 51.2                           | 370.3           | 2.5                                       | 22           | 29           |
| P79      | 0.7                | 39.1         | 86.4            | 0.3               | 17.2         | 37.0            | 40           | 123.4           | 50                    | 51.2                           | 370.3           | 2.5                                       | 36           | 47           |
| P95      | 0.9                | 50.3         | 111.1           | 0.1               | 5.7          | 12.3            | 40           | 123.4           | 50                    | 51.2                           | 370.3           | 2.5                                       | 31           | 41           |
| P100     | 1.0                | 97.8         | 216.0           | 0                 | 0            | 0               | 70           | 216.0           | 50                    | 89.6                           | 648.1           | 4.3                                       | 52           | 39           |

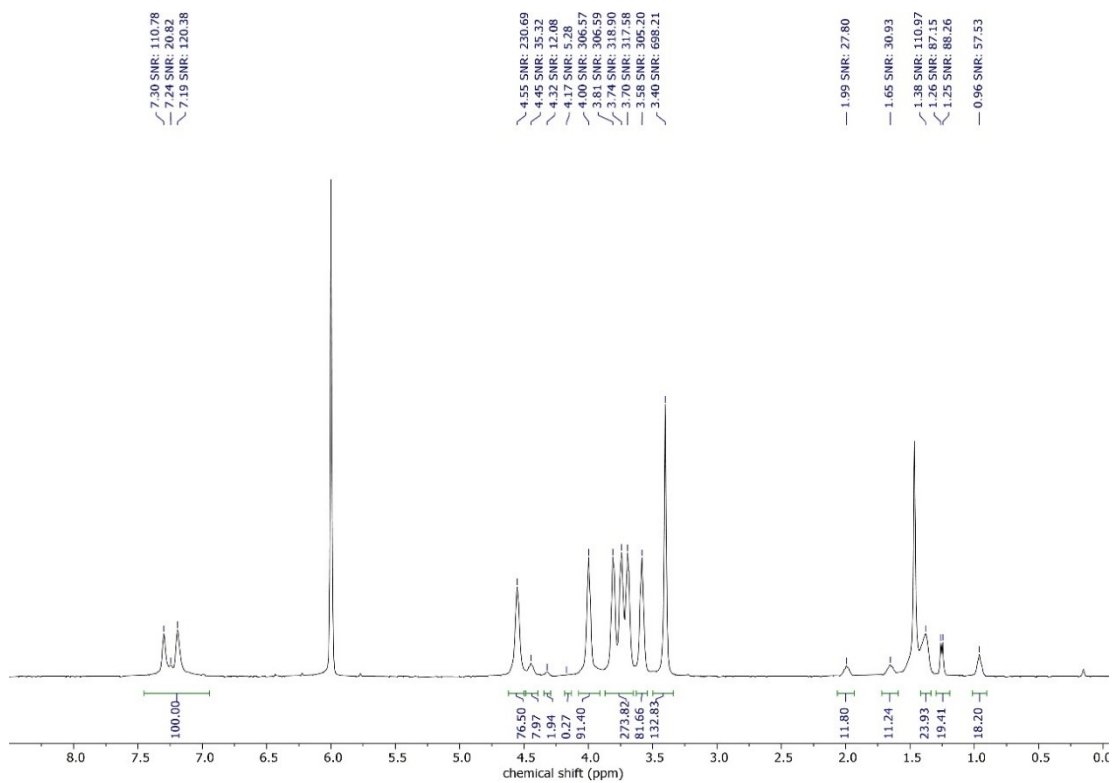

**Fig. S8.** High-temperature  $^1\text{H}$  NMR spectrum ( $\text{C}_2\text{D}_2\text{Cl}_4$ , 400 MHz, 393K) of **P12**.

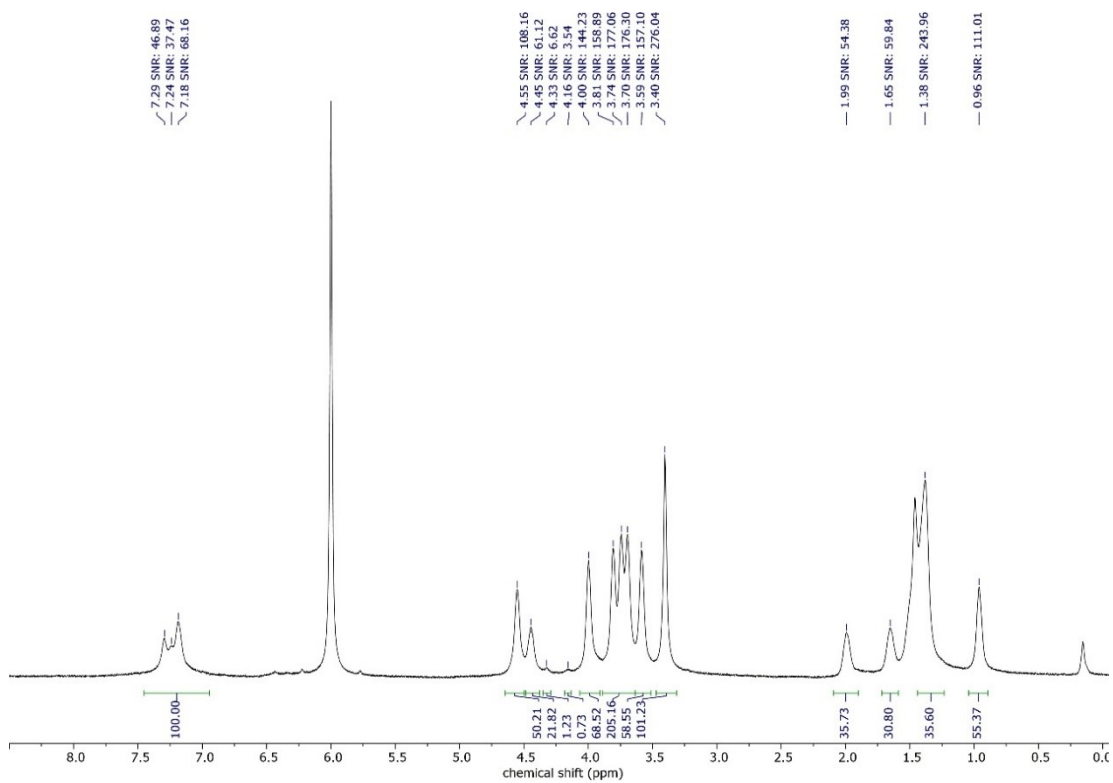

**Fig. S9.** High-temperature  $^1\text{H}$  NMR spectrum ( $\text{C}_2\text{D}_2\text{Cl}_4$ , 400 MHz, 393K) of **P35**.

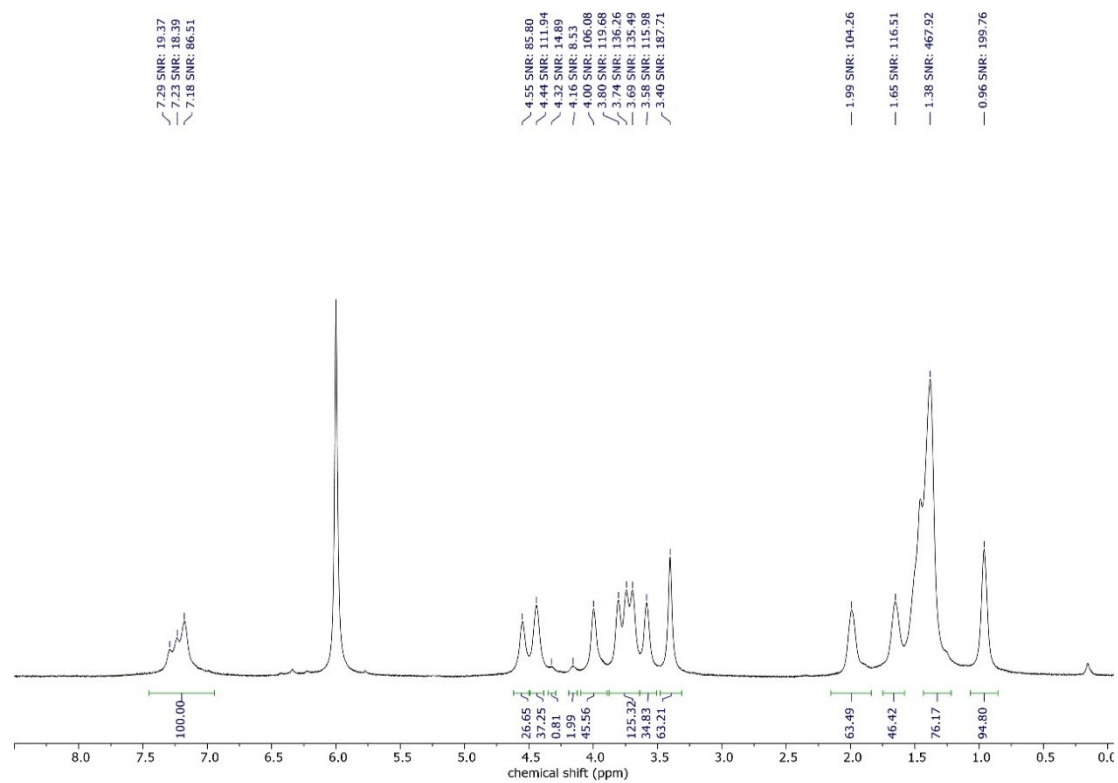

**Fig. S10.** High-temperature  $^1\text{H}$  NMR spectrum ( $\text{C}_2\text{D}_2\text{Cl}_4$ , 400 MHz, 393K) of **P59**.

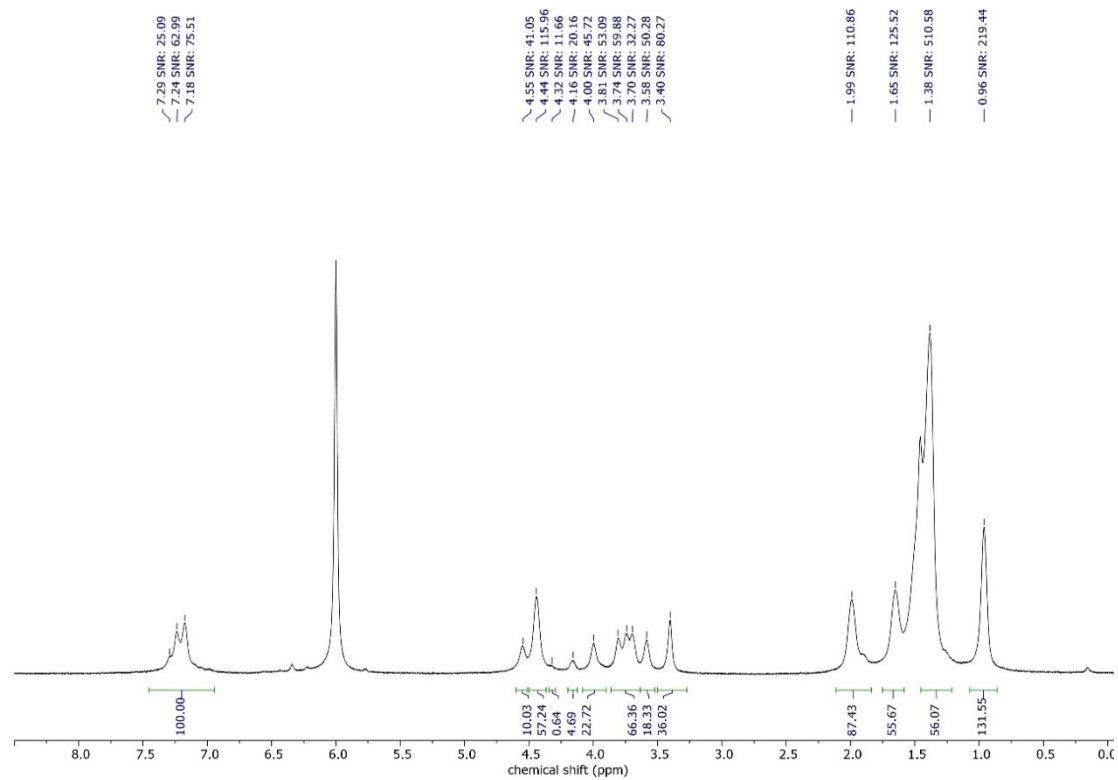

**Fig. S11.** High-temperature  $^1\text{H}$  NMR spectrum ( $\text{C}_2\text{D}_2\text{Cl}_4$ , 400 MHz, 393K) of **P79**.

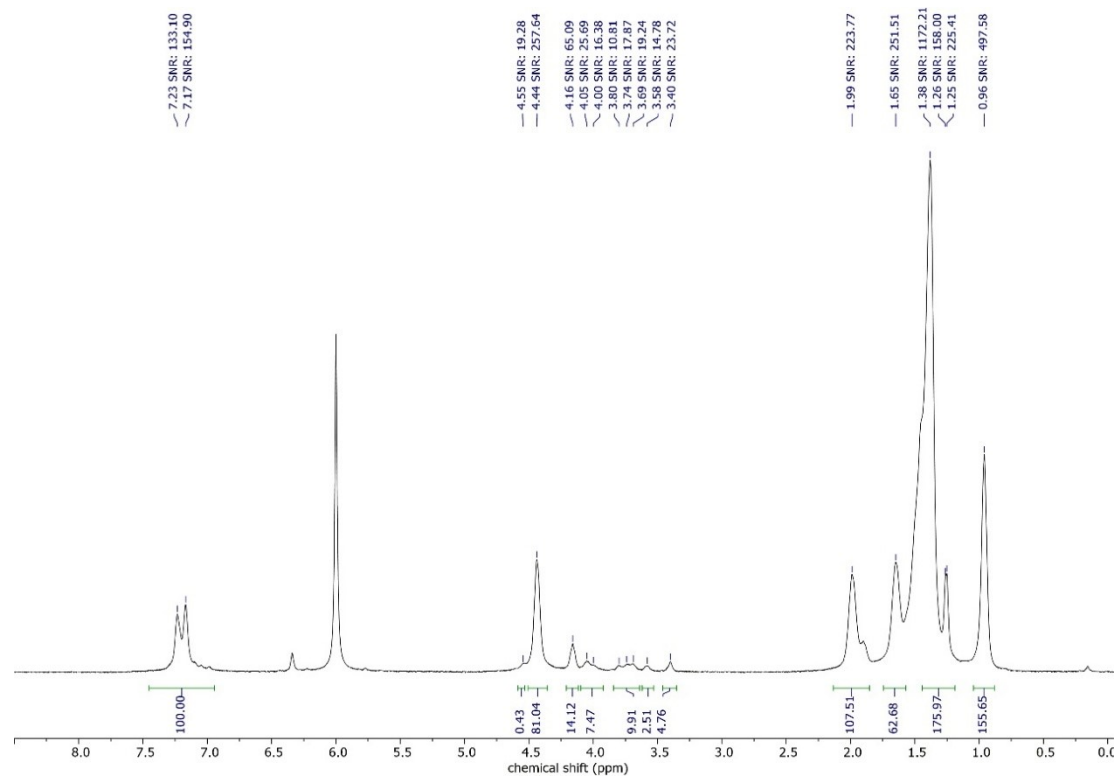

Fig. S12. High-temperature  $^1\text{H}$  NMR spectrum ( $\text{C}_2\text{D}_2\text{Cl}_4$ , 400 MHz, 393K) of **P97**.

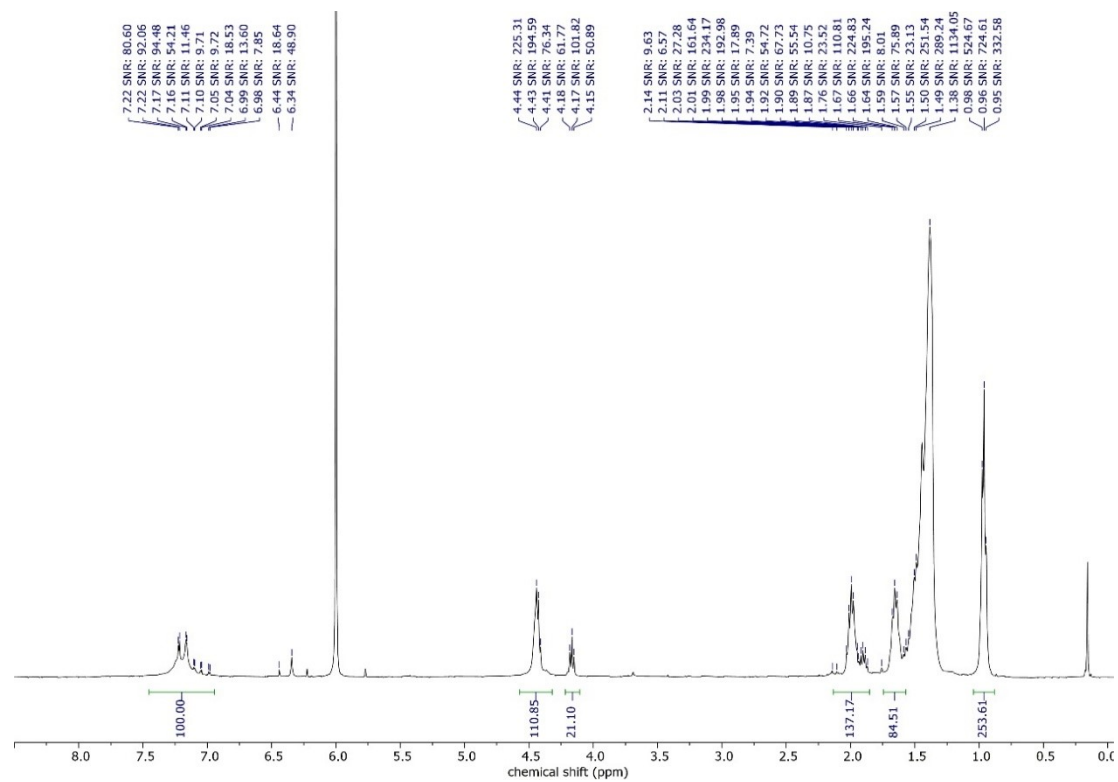

Fig. S13. High-temperature  $^1\text{H}$  NMR spectrum ( $\text{C}_2\text{D}_2\text{Cl}_4$ , 400 MHz, 393K) of **P100**.

## S1.5. Molecular weight derivation by NMR

The degree of polymerization  $X_n^{NMR,j}$  was obtained by calculating the ratio of the total number of TT units to the number of terminal TT units with oligoether or alkoxy side chains according to:

$$X_n^{NMR,j} = \frac{1}{2} \cdot \frac{\int I_{chain}^j d\delta + \int I_{end}^j d\delta}{\int I_{end}^j d\delta} \quad (S1)$$

where  $j = g_3$  or  $a_{10}$  denotes signals associated with the  $\alpha$ -CH<sub>2</sub> protons of oligoether or alkoxy side chains, respectively,  $I_{chain}^j$  is the intensity of the signal associated with  $\alpha$ -CH<sub>2</sub> from the side chains of main-chain TT units (region I or II in **Fig. 1b**) and  $I_{end}^j$  is the intensity of the signal associated with  $\alpha$ -CH<sub>2</sub> from the side chains of terminal TT units (region III or IV for  $g_3$  or  $a_{10}$ , respectively, in **Fig. 1b**). Note that in case of **P97** the  $\alpha$ -CH<sub>2</sub> signal from the terminal oligoether chain was overshadowed by the  $\alpha$ -CH<sub>2</sub> signal from the main-chain alkoxy chain and thus we were unable to calculate  $X_n^{NMR,g_3}$  (**Fig. S12**).

The copolymer-dependent average molecular weight of a TT-T2 repeat unit was determined according to

$$M_{r.u.} = M_{a_{10}TT} \cdot r_{CH_3} + M_{g_3TT} \cdot (1 - r_{CH_3}) + M_{T2} \quad (S2)$$

where the two TT units  $g_3TT$  and  $a_{10}TT$  have a similar molecular weight of  $M_{g_3TT} = 464.6$  g mol<sup>-1</sup> and  $M_{a_{10}TT} = 452.8$  g mol<sup>-1</sup>, respectively,  $r_{CH_3}$  is the fraction of TT units with alkoxy side chains and  $M_{T2}$  is the weight of a bithiophene unit (**Fig. 3b, Table 1**).

The number-average molecular weight  $M_n^{NMR,j}$  was obtained according to:

$$M_n^{NMR,j} = M_{r.u.} \cdot X_n^{NMR,j} + 2 \cdot M_H \quad (S3)$$

## S1.6. Molecular weight estimation by SEC

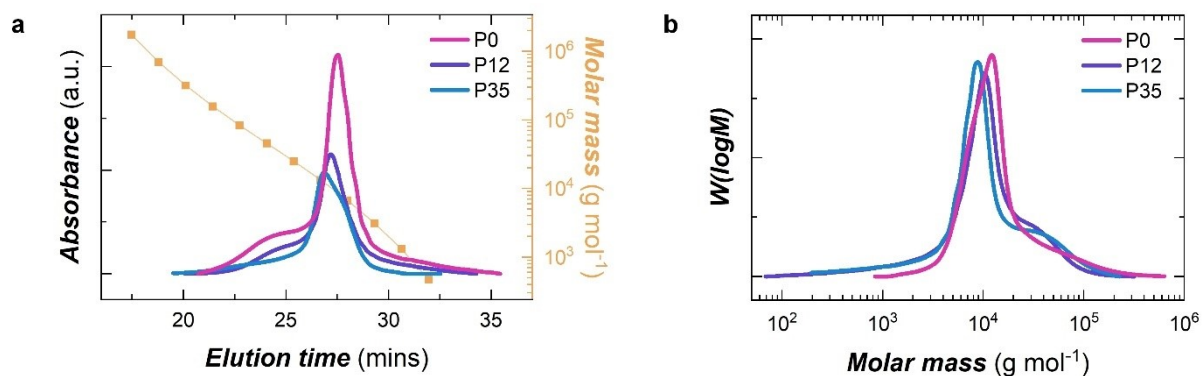

**Fig. S14. Size exclusion chromatography (SEC).** (a) Elugram with calibration curve (orange) and (b) molar mass distribution of **P0 – P35**; chromatograms were recorded at 308 K in  $\text{CHCl}_3$  with 0.5 vol %  $\text{Et}_3\text{N}$ .

**Table S2. Molecular weight estimations from SEC.** Number-averaged molecular weight

$M_n^{SEC}$ , weight-averaged molecular weight  $M_w^{SEC}$  and dispersity  $\mathcal{D}$  of **P0 – P35** estimated by SEC.

| Polymer | $M_n^{SEC}$ (kg mol <sup>-1</sup> ) | $M_w^{SEC}$ (kg mol <sup>-1</sup> ) | $\mathcal{D}$ (-) |
|---------|-------------------------------------|-------------------------------------|-------------------|
| P0      | 10                                  | 22                                  | 2.2               |
| P12     | 5                                   | 16                                  | 3.4               |
| P35     | 5                                   | 17                                  | 3.4               |

## S2. Synthetic complexity index of polymerization ( $SCI_{poly}$ )

The synthetic complexity analysis only considering the polymerization step, i.e.,  $SCI_{poly}$ , was described in ref. <sup>5</sup>. The  $SCI_{poly}$  calculation is summarized by:

$$SCI_{poly} = 35 \cdot \frac{NSS}{NSS_{max}} + 25 \cdot \frac{\log RY}{\log RY_{max}} + 15 \cdot \frac{NO}{NO_{max}} + 15 \cdot \frac{NC}{NC_{max}} + 10 \cdot \frac{NH}{NH_{max}} \quad (S4)$$

where NSS is the number of synthetic steps, RY is the reciprocal yield of the total yield, NO is the number of operations, NC is the number of columns, NH is the number of hazard codes and the coefficient of each term is assigned empirically according to overall cost and safety.

**Table S3. Input parameters for SCI<sub>poly</sub> calculations of synthesized polymers and polymers from literature.**

| Polymer                          | SCI <sub>poly</sub>                 | Number of Synthetic Steps | Yield | Reciprocal Yield (100/Yield) | Operations |               |            |         | Sum of Operations | Number of Columns | Hazards                                           |                                     |                                                   |                                          |                                         |                                           |                                     |                                                                  | Sum of Hazard Codes |    |
|----------------------------------|-------------------------------------|---------------------------|-------|------------------------------|------------|---------------|------------|---------|-------------------|-------------------|---------------------------------------------------|-------------------------------------|---------------------------------------------------|------------------------------------------|-----------------------------------------|-------------------------------------------|-------------------------------------|------------------------------------------------------------------|---------------------|----|
|                                  |                                     |                           |       |                              | Quenching  | Precipitation | Extraction | Soxhlet |                   |                   | Carcinogenic / mutagenic (H340, H341, H350, H351) | Toxic for reproduction (H360, H361) | Highly toxic (H300, H304, H310, H330, H370, H372) | Environmentally toxic (H400, H410, H411) | Highly reactive with water (H260, H261) | Highly flammable (H220, H222, H224, H250) | Highly corrosive (H290, H314, H318) | Explosive (H200, H201, H202, H203, H204, H205, H240, H241, H271) |                     |    |
| Synthesized in this work         | P12                                 | 50                        | 1     | 72                           | 1.4        | 0             | 1          | 0       | 3                 | 4                 | 0                                                 | 1                                   | 2                                                 | 2                                        | 2                                       | 0                                         | 0                                   | 0                                                                | 0                   | 7  |
|                                  | P35                                 | 58                        | 1     | 42                           | 2.4        | 0             | 1          | 0       | 3                 | 4                 | 0                                                 | 1                                   | 2                                                 | 2                                        | 2                                       | 0                                         | 0                                   | 0                                                                | 0                   | 7  |
|                                  | P59                                 | 63                        | 1     | 29                           | 3.4        | 0             | 1          | 0       | 3                 | 4                 | 0                                                 | 1                                   | 2                                                 | 2                                        | 2                                       | 0                                         | 0                                   | 0                                                                | 0                   | 7  |
|                                  | P79                                 | 56                        | 1     | 47                           | 2.1        | 0             | 1          | 0       | 3                 | 4                 | 0                                                 | 1                                   | 2                                                 | 2                                        | 2                                       | 0                                         | 0                                   | 0                                                                | 0                   | 7  |
|                                  | P97                                 | 58                        | 1     | 41                           | 2.4        | 0             | 1          | 0       | 3                 | 4                 | 0                                                 | 1                                   | 2                                                 | 2                                        | 2                                       | 0                                         | 0                                   | 0                                                                | 0                   | 7  |
|                                  | P100                                | 59                        | 1     | 39                           | 2.6        | 0             | 1          | 0       | 3                 | 4                 | 0                                                 | 1                                   | 2                                                 | 2                                        | 2                                       | 0                                         | 0                                   | 0                                                                | 0                   | 7  |
| p(g <sub>3</sub> TT-T2) by ADAP  | P0                                  | 44                        | 1     | 97                           | 2.1        | 0             | 1          | 0       | 3                 | 4                 | 0                                                 | 1                                   | 2                                                 | 2                                        | 2                                       | 0                                         | 0                                   | 0                                                                | 0                   | 7  |
|                                  | p(g <sub>3</sub> TT-T2)             | 46                        | 1     | 87                           | 2.1        | 0             | 1          | 0       | 3                 | 4                 | 0                                                 | 1                                   | 2                                                 | 2                                        | 2                                       | 0                                         | 0                                   | 0                                                                | 0                   | 7  |
|                                  | p(g <sub>3</sub> TT-T2)             | 45                        | 1     | 92                           | 2.1        | 0             | 1          | 0       | 3                 | 4                 | 0                                                 | 1                                   | 2                                                 | 2                                        | 2                                       | 0                                         | 0                                   | 0                                                                | 0                   | 7  |
|                                  | p(g <sub>3</sub> TT-T2)             | 47                        | 1     | 81                           | 2.1        | 0             | 1          | 0       | 3                 | 4                 | 0                                                 | 1                                   | 2                                                 | 2                                        | 2                                       | 0                                         | 0                                   | 0                                                                | 0                   | 7  |
|                                  | p(g <sub>3</sub> TT-T2)             | 50                        | 1     | 65                           | 2.1        | 0             | 1          | 0       | 3                 | 4                 | 0                                                 | 1                                   | 2                                                 | 2                                        | 2                                       | 0                                         | 0                                   | 0                                                                | 0                   | 7  |
|                                  | p(g <sub>3</sub> TT-T2)             | 53                        | 1     | 54                           | 2.1        | 0             | 1          | 0       | 3                 | 4                 | 0                                                 | 1                                   | 2                                                 | 2                                        | 2                                       | 0                                         | 0                                   | 0                                                                | 0                   | 7  |
|                                  | p(g <sub>3</sub> TT-T2)             | 55                        | 1     | 45                           | 2.1        | 0             | 1          | 0       | 3                 | 4                 | 0                                                 | 1                                   | 2                                                 | 2                                        | 2                                       | 0                                         | 0                                   | 0                                                                | 0                   | 7  |
|                                  | p(g <sub>3</sub> TT-T2)             | 48                        | 1     | 76                           | 2.1        | 0             | 1          | 0       | 3                 | 4                 | 0                                                 | 1                                   | 2                                                 | 2                                        | 2                                       | 0                                         | 0                                   | 0                                                                | 0                   | 7  |
| p(g <sub>3</sub> TT-T2) (by DAP) | 72                                  | 1                         | 33    | 3.0                          | 1          | 2             | 1          | 4       | 4                 | 0                 | 3                                                 | 4                                   | 4                                                 | 4                                        | 0                                       | 0                                         | 0                                   | 0                                                                | 15                  |    |
| TT-T2 polymers by Stille         | p(g <sub>3</sub> T2-TT)             | 71                        | 1     | 47                           | 2.1        | 1             | 3          | 1       | 5                 | 10                | 0                                                 | 2                                   | 3                                                 | 8                                        | 3                                       | 0                                         | 1                                   | 0                                                                | 0                   | 17 |
|                                  | p(g <sub>4</sub> T2-TT)             | 96                        | 1     | 18                           | 5.6        | 0             | 2          | 0       | 6                 | 8                 | 1                                                 | 3                                   | 3                                                 | 8                                        | 2                                       | 0                                         | 0                                   | 0                                                                | 0                   | 16 |
|                                  | p(g <sub>4</sub> T2-TT) (no column) | 60                        | 1     | 77                           | 1.3        | 0             | 2          | 0       | 6                 | 8                 | 0                                                 | 3                                   | 3                                                 | 8                                        | 2                                       | 0                                         | 0                                   | 0                                                                | 0                   | 16 |
|                                  | pgBTTT                              | 76                        | 1     | 24                           | 4.2        | 0             | 2          | 0       | 5                 | 7                 | 0                                                 | 3                                   | 5                                                 | 7                                        | 3                                       | 0                                         | 0                                   | 0                                                                | 0                   | 18 |
|                                  | pBTTT                               | 56                        | 1     | 87                           | 1.1        | 0             | 2          | 0       | 5                 | 7                 | 0                                                 | 1                                   | 3                                                 | 6                                        | 5                                       | 0                                         | 0                                   | 0                                                                | 0                   | 15 |
| pBTTT-like copolymer series      | g-100%                              | 60                        | 1     | 67                           | 1.5        | 0             | 2          | 0       | 5                 | 7                 | 0                                                 | 3                                   | 4                                                 | 6                                        | 2                                       | 0                                         | 0                                   | 0                                                                | 0                   | 15 |
|                                  | g-90%                               | 75                        | 1     | 25                           | 4.0        | 0             | 2          | 0       | 5                 | 7                 | 0                                                 | 3                                   | 4                                                 | 6                                        | 2                                       | 0                                         | 0                                   | 0                                                                | 0                   | 15 |
|                                  | g-75%                               | 75                        | 1     | 25                           | 4.0        | 0             | 2          | 0       | 5                 | 7                 | 0                                                 | 3                                   | 4                                                 | 6                                        | 2                                       | 0                                         | 0                                   | 0                                                                | 0                   | 15 |
|                                  | g-50%                               | 62                        | 1     | 58                           | 1.7        | 0             | 2          | 0       | 5                 | 7                 | 0                                                 | 3                                   | 4                                                 | 6                                        | 2                                       | 0                                         | 0                                   | 0                                                                | 0                   | 15 |
|                                  | g-0%                                | 61                        | 1     | 65                           | 1.5        | 0             | 2          | 0       | 5                 | 7                 | 0                                                 | 3                                   | 4                                                 | 6                                        | 2                                       | 0                                         | 0                                   | 0                                                                | 0                   | 15 |
| NDI-T2 copolymer series          | P-0                                 | 58                        | 1     | 77                           | 1.3        | 0             | 2          | 0       | 5                 | 7                 | 0                                                 | 1                                   | 4                                                 | 5                                        | 4                                       | 0                                         | 0                                   | 0                                                                | 0                   | 14 |
|                                  | P-10                                | 62                        | 1     | 55                           | 1.8        | 0             | 2          | 0       | 5                 | 7                 | 0                                                 | 1                                   | 4                                                 | 5                                        | 4                                       | 0                                         | 0                                   | 0                                                                | 0                   | 14 |
|                                  | P-25                                | 64                        | 1     | 50                           | 2.0        | 0             | 2          | 0       | 5                 | 7                 | 0                                                 | 1                                   | 4                                                 | 5                                        | 4                                       | 0                                         | 0                                   | 0                                                                | 0                   | 14 |
|                                  | P-50                                | 63                        | 1     | 54                           | 1.9        | 0             | 2          | 0       | 5                 | 7                 | 0                                                 | 1                                   | 4                                                 | 5                                        | 4                                       | 0                                         | 0                                   | 0                                                                | 0                   | 14 |
|                                  | P-75                                | 58                        | 1     | 76                           | 1.3        | 0             | 2          | 0       | 5                 | 7                 | 0                                                 | 1                                   | 4                                                 | 5                                        | 4                                       | 0                                         | 0                                   | 0                                                                | 0                   | 14 |
|                                  | P-90                                | 59                        | 1     | 70                           | 1.4        | 0             | 2          | 0       | 5                 | 7                 | 0                                                 | 1                                   | 4                                                 | 5                                        | 4                                       | 0                                         | 0                                   | 0                                                                | 0                   | 14 |
|                                  | P-100                               | 64                        | 1     | 48                           | 2.1        | 0             | 2          | 0       | 5                 | 7                 | 0                                                 | 1                                   | 4                                                 | 5                                        | 4                                       | 0                                         | 0                                   | 0                                                                | 0                   | 14 |

| Polymer               |     | SCI <sub>poly</sub> | Number of Synthetic Steps |                              | Operations |               |            |         | Sum of Operations | Number of Columns | Hazards                                           |                                     |                                                   |                                          |                                         |                                           |                                     |                                                                  | Sum of Hazard Codes |    |
|-----------------------|-----|---------------------|---------------------------|------------------------------|------------|---------------|------------|---------|-------------------|-------------------|---------------------------------------------------|-------------------------------------|---------------------------------------------------|------------------------------------------|-----------------------------------------|-------------------------------------------|-------------------------------------|------------------------------------------------------------------|---------------------|----|
|                       |     |                     | Yield                     | Reciprocal Yield (100/Yield) | Quenching  | Precipitation | Extraction | Soxhlet |                   |                   | Carcinogenic / mutagenic (H340, H341, H350, H351) | Toxic for reproduction (H360, H361) | Highly toxic (H300, H304, H310, H330, H370, H372) | Environmentally toxic (H400, H410, H411) | Highly reactive with water (H260, H261) | Highly flammable (H220, H222, H224, H250) | Highly corrosive (H290, H314, H318) | Explosive (H200, H201, H202, H203, H204, H205, H240, H241, H271) |                     |    |
| Polythiophene by KCTP | P5  | 60                  | 1                         | 76                           | 1.3        | 1             | 2          | 0       | 4                 | 7                 | 0                                                 | 6                                   | 4                                                 | 5                                        | 3                                       | 0                                         | 0                                   | 0                                                                | 0                   | 18 |
|                       | P10 | 60                  | 1                         | 77                           | 1.3        | 1             | 2          | 0       | 4                 | 7                 | 0                                                 | 6                                   | 4                                                 | 5                                        | 3                                       | 0                                         | 0                                   | 0                                                                | 0                   | 18 |
|                       | P20 | 60                  | 1                         | 75                           | 1.3        | 1             | 2          | 0       | 4                 | 7                 | 0                                                 | 6                                   | 4                                                 | 5                                        | 3                                       | 0                                         | 0                                   | 0                                                                | 0                   | 18 |
|                       | P30 | 65                  | 1                         | 55                           | 1.8        | 1             | 2          | 0       | 4                 | 7                 | 0                                                 | 6                                   | 4                                                 | 5                                        | 3                                       | 0                                         | 0                                   | 0                                                                | 0                   | 18 |
|                       | P50 | 68                  | 1                         | 43                           | 2.3        | 1             | 2          | 0       | 4                 | 7                 | 0                                                 | 6                                   | 4                                                 | 5                                        | 3                                       | 0                                         | 0                                   | 0                                                                | 0                   | 18 |

### S3. Polymer characterization

#### S3.1. Ultraviolet photoelectron spectroscopy (UPS)

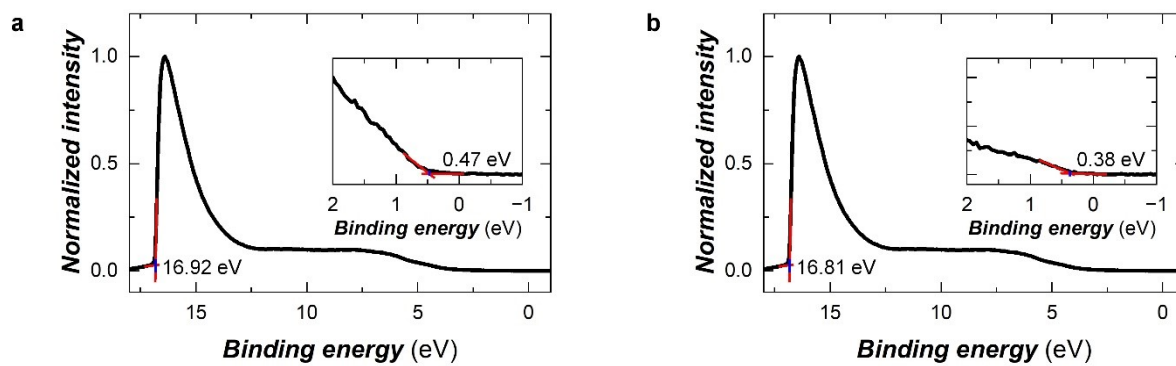

Fig. S15. UPS spectra of (a) P12 and (b) P35 thin films on ITO/glass substrates.

## S3.2. Electrochemical characterization

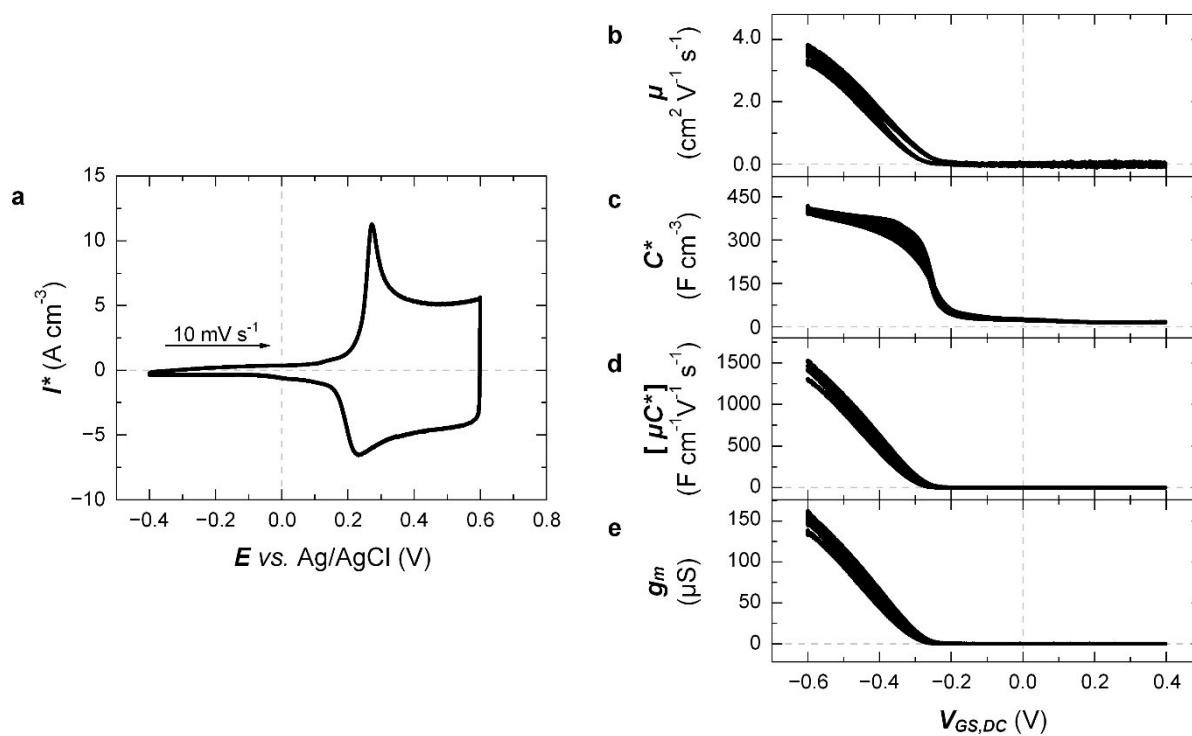

**Fig. S16. Electrochemical characterization of P12.** (a) Cyclic voltammetry of thin films; small signal analysis of OECTs yields (b) mobility  $\mu$ , (c) volumetric capacitance  $C^*$ , (d) figure of merit  $[\mu C^*]$  and (e) transconductance  $g_m$  as a function of gate voltage  $V_{GS,DC}$ ; the material characterized was stored in air for 2 weeks after synthesis.

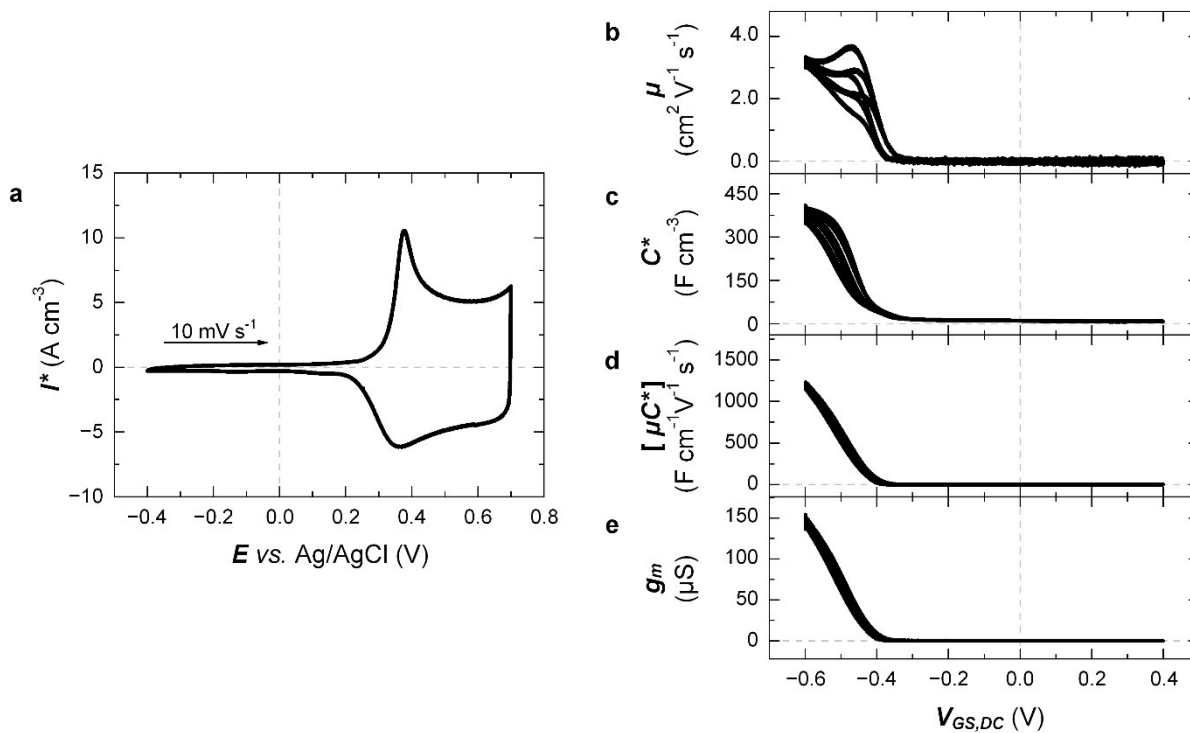

**Fig. S17. Electrochemical characterization of P35.** (a) Cyclic voltammetry of thin films; small signal analysis of OECTs yields (b) mobility  $\mu$ , (c) volumetric capacitance  $C^*$ , (d) figure of merit  $[\mu C^*]$  and (e) transconductance  $g_m$  as a function of gate voltage  $V_{GS,DC}$ ; the material characterized was stored in air for 2 weeks after synthesis.

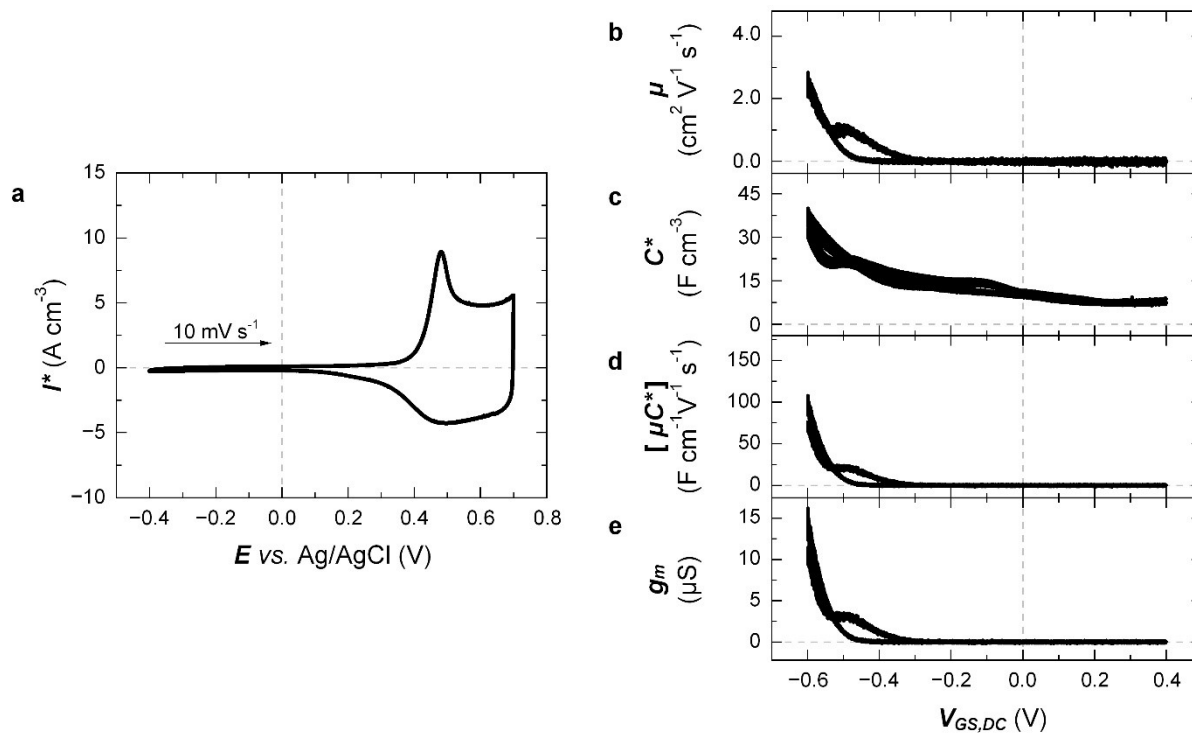

**Fig. S18. Electrochemical characterization of P59.** (a) Cyclic voltammetry of thin films; small signal analysis of OECTs yields (b) mobility  $\mu$ , (c) volumetric capacitance  $C^*$ , (d) figure of merit  $[\mu C^*]$  and (e) transconductance  $g_m$  as a function of gate voltage  $V_{GS,DC}$ ; the material characterized was stored in air for 2 weeks after synthesis.

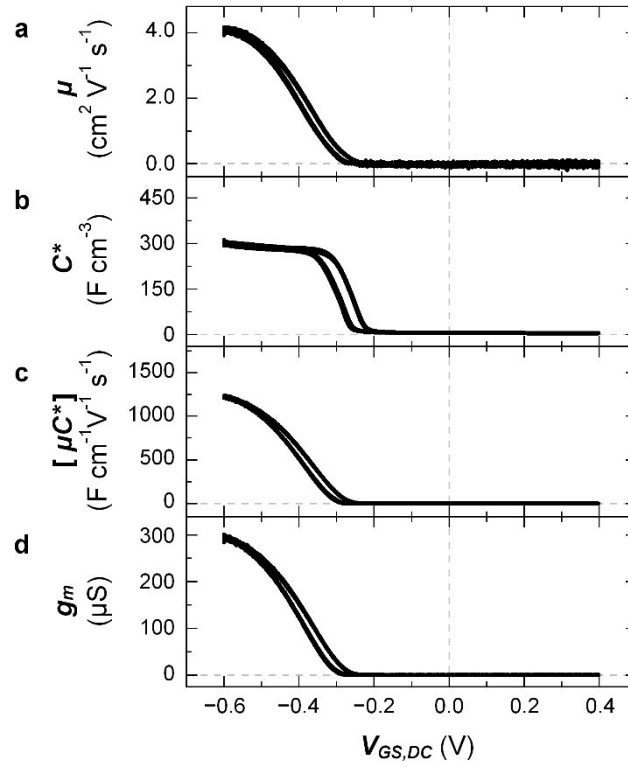

**Fig. S19. OECT performance characterization of P12 stored in air for 1.5 years.** Small signal analysis of OECTs yields (a) mobility  $\mu$ , (b) volumetric capacitance  $C^*$ , (c) figure of merit  $[\mu C^*]$  and (d) transconductance  $g_m$  as a function of gate voltage  $V_{GS,DC}$ .

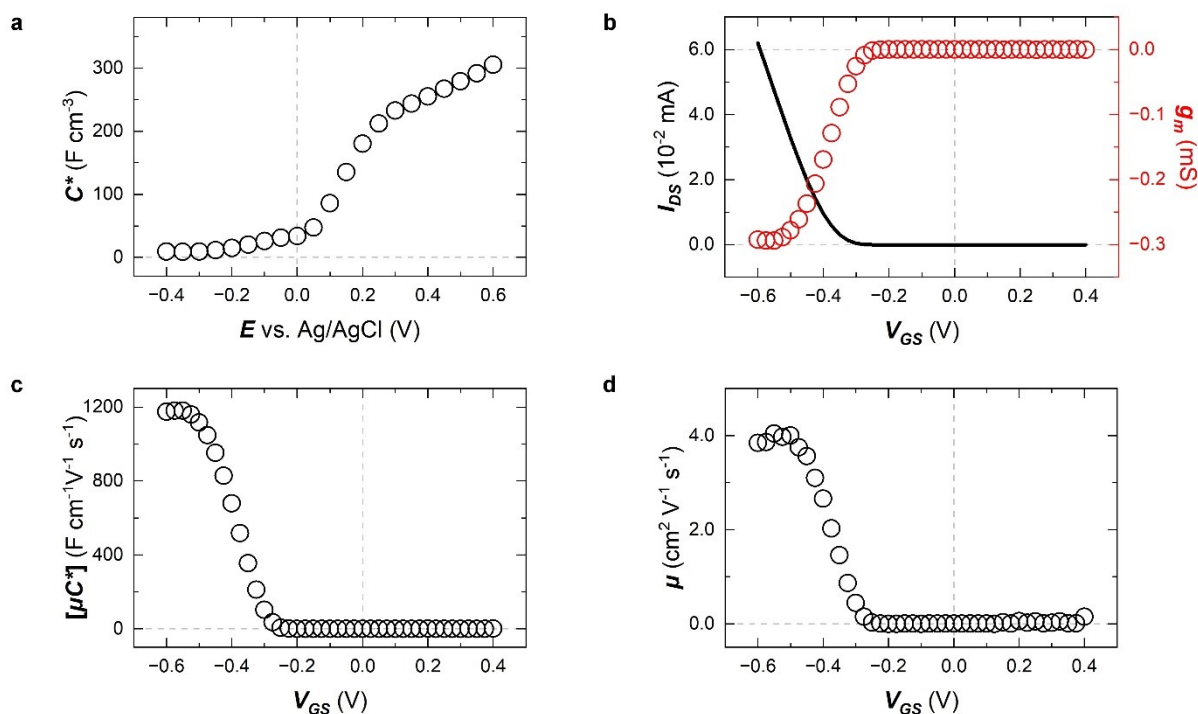

**Fig. S20. OECT performance of P12 by steady-state transfer characterization.** (a)

Volumetric capacitance  $C^*$  from electrochemical impedance spectroscopy (EIS); (b) transfer curves (black) and transconductance  $g_m$  (red), which is the first derivative of drain current with respect to gate potential  $dI_{DS}/dV_{GS}$  as a function of gate potential  $V_{GS}$ ; the characterization was conducted with a forward scan of  $V_{GS}$  from  $-0.6$  V to  $+0.4$  V in the linear regime ( $V_{DS} = +0.01$  V); (c) figure of merit  $[\mu C^*]$  obtained from transfer curves; (d) mobility  $\mu$  calculated by dividing  $[\mu C^*]$  by  $C^*$ ; the material characterized was stored in air for 1.5 years after synthesis.

**Table S4. OEET device performance by steady-state transfer curve characterization.**

Maximum value of figure of merit  $[\mu C^*]_{max}$  obtained from OEET transfer curves, maximum volumetric capacitance  $C^*_{max}$  determined through EIS; maximum mobility  $\mu_{max}$  obtained by dividing  $[\mu C^*]$  by  $C^*$ ; values within brackets denote the corresponding gate potential for each value; the means and standard deviations of the  $[\mu C^*]_{max}$  and  $\mu_{max}$  values extracted from four channels are given; <sup>a</sup>from P2 in ref. 6; <sup>b</sup>stored in air for 1.5 years.

| Polymer                              | $[\mu C^*]_{max}$<br>(F cm <sup>-1</sup> V <sup>-1</sup> s <sup>-1</sup> ) | $C^*_{max}$<br>(F cm <sup>-3</sup> ) | $\mu_{max}$<br>(cm <sup>2</sup> V <sup>-1</sup> s <sup>-1</sup> ) |
|--------------------------------------|----------------------------------------------------------------------------|--------------------------------------|-------------------------------------------------------------------|
| p(g <sub>3</sub> TT-T2) <sup>a</sup> | 368 ± 9 (-0.55 V)                                                          | > 215 ± 24 (-0.6 V)                  | 1.8 ± 0.2 (-0.5 V)                                                |
| P12 <sup>b</sup>                     | 1180 (-0.58 V)                                                             | 305 (-0.6 V)                         | 4.0 (-0.55 V)                                                     |

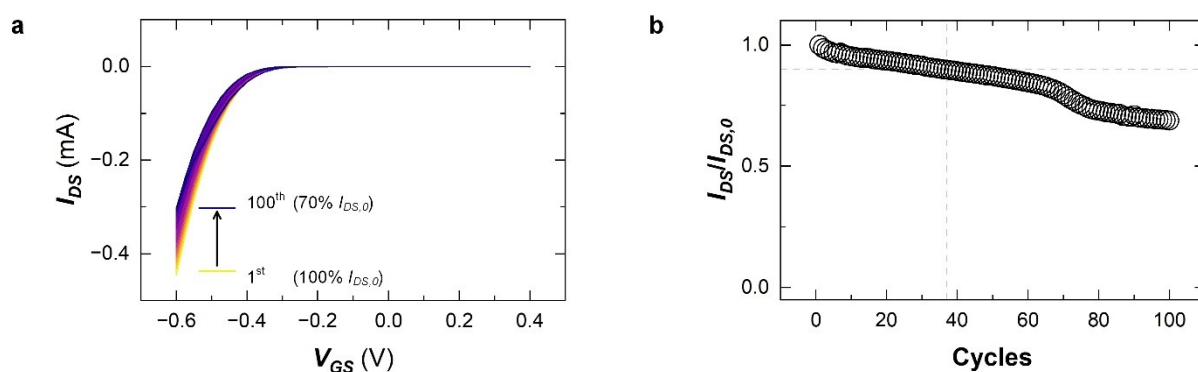

**Fig. S21. OEET cycling stability of P12.** (a) Transfer curves of 100 cycles with the gate potential  $V_{GS}$  varying from -0.6 V to +0.4 V at a drain potential  $V_{DS} = -0.6$  V (yellow → blue: 1<sup>st</sup> cycle → 100<sup>th</sup> cycle); (b) relative on-current at  $V_{GS} = -0.6$  V compared to the initial cycle  $I_{DS}/I_{DS,0}$ .

### S3.3. Grazing incidence wide-angle X-ray scattering (GIWAXS)

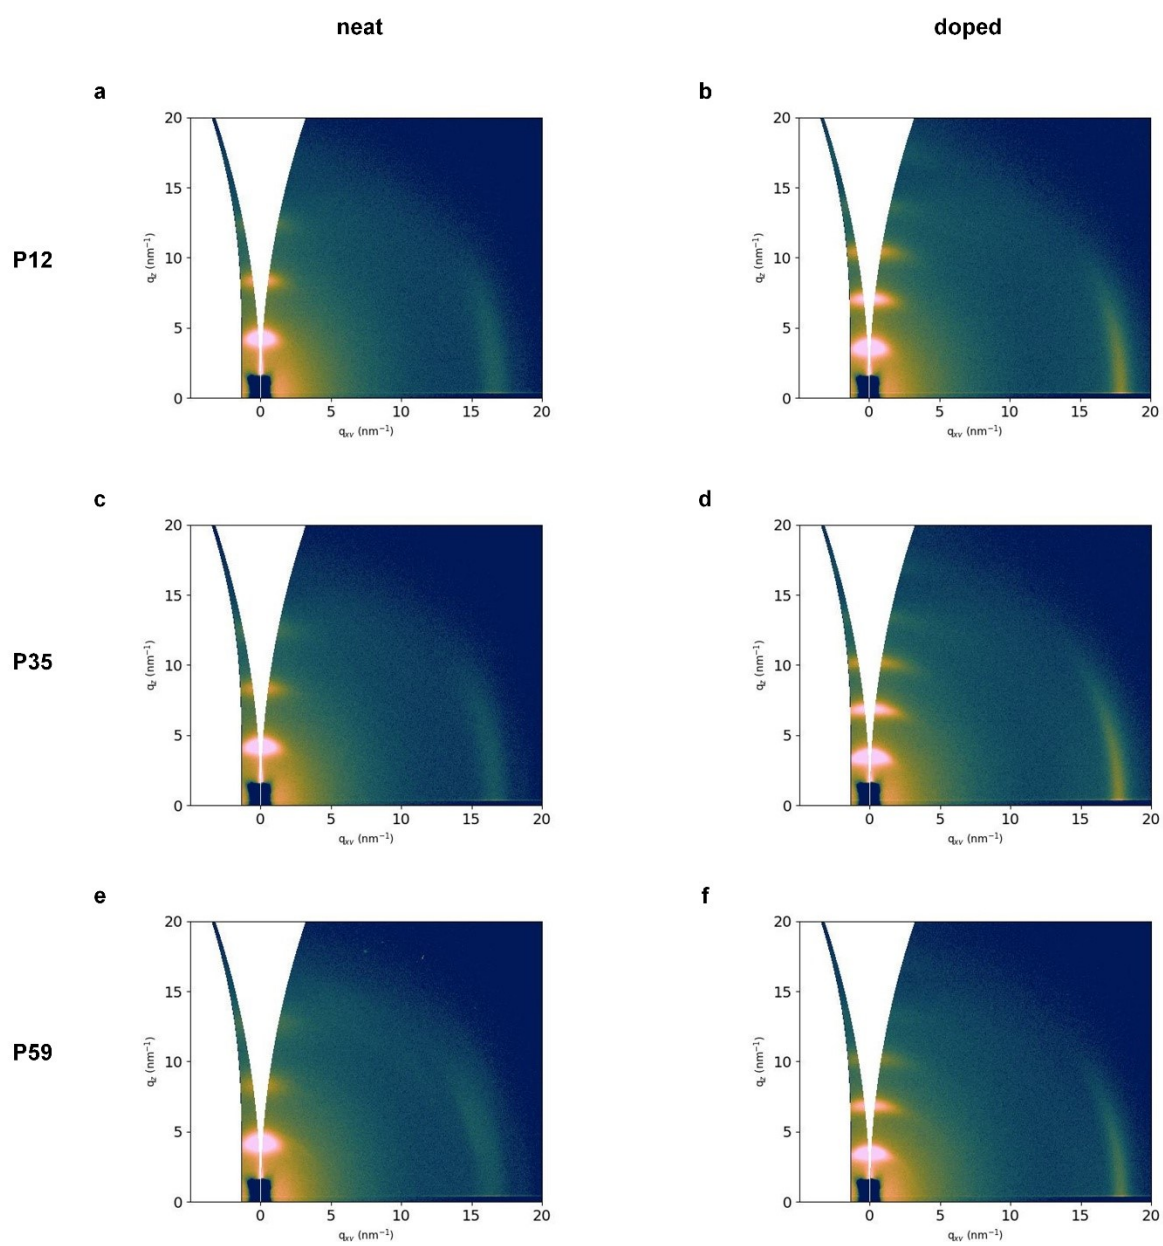

Fig. S22. GIWAXS patterns of neat and F<sub>4</sub>TCNQ-doped thin films.

### S3.4. Electrical and mechanical properties

**Table S5. Electrical and mechanical properties.** Elastic modulus of neat and F<sub>4</sub>TCNQ-doped thick polymer films,  $E_{neat}$  and  $E_{doped}$ , electrical conductivity of F<sub>4</sub>TCNQ-doped thick and thin films,  $\sigma_{thick}$  and  $\sigma_{thin}$ ;  $\sigma$  values are obtained by measuring one sample and error bars reflect the uncertainty in resistance and thickness while in case of  $E$  the mean and standard deviation of 9 nanoindentation creep measurements of the same sample are shown.

| polymer | $E_{neat}$<br>(MPa) | $E_{doped}$<br>(MPa) | $\sigma_{thick}$<br>(S cm <sup>-1</sup> ) | $\sigma_{thin}$<br>(S cm <sup>-1</sup> ) |
|---------|---------------------|----------------------|-------------------------------------------|------------------------------------------|
| P12     | 143 ± 9             | 865 ± 64             | 203 ± 40                                  | 390 ± 12                                 |
| P35     | 266 ± 59            | 985 ± 387            | 408 ± 127                                 | 405 ± 4                                  |
| P59     | 195 ± 13            | 736 ± 25             | 140 ± 27                                  | 202 ± 6                                  |

## S4. References

1. O. V. Dolomanov, L. J. Bourhis, R. J. Gildea, J. A. K. Howard and H. Puschmann, OLEX2: a complete structure solution, refinement and analysis program, *J. Appl. Crystallogr.*, 2009, **42**, 339-341.
2. M. A. Viswamitra, Crystal Structure of Copper Ammonium Oxalate Dihydrate,  $\text{Cu}(\text{NH}_4)_2(\text{C}_2\text{O}_4)_2 \cdot 2\text{H}_2\text{O}$ , *J. Chem. Phys.*, 1962, **37**, 1408-1414.
3. Y. Kim, J. Kimpel, A. Giovannitti and C. Müller, Small signal analysis for the characterization of organic electrochemical transistors, *Nat. Commun.*, 2024, **15**, 7606.
4. J. Kimpel, I. Anderson, D. Zhu, J. Kala, P. Sowinski, A. Giovannitti, L. Öhrström, J. Nelson and C. Müller, From  $\pi$ - $\pi$  Stacking to Chain Entanglements: Single Crystals of Oligoether-Substituted Thieno[3,2-b]thiophenes, *Macromolecules*, 2026, **59**, 4612-4621.
5. J. Kimpel, Y. Kim, H. Schomaker, D. R. Hinojosa, J. Asatryan, J. Martín, R. Kroon, M. Sommer and C. Müller, Open-flask, ambient temperature direct arylation synthesis of mixed ionic-electronic conductors, *Sci. Adv.*, 2025, **11**, eadv8168.
6. J. Kimpel, Y. Kim, J. Asatryan, J. Martín, R. Kroon and C. Müller, High-mobility organic mixed conductors with a low synthetic complexity index via direct arylation polymerization, *Chem. Sci.*, 2024, **15**, 7679-7688.
